# Supplementary material
Source: PubMed Central journal article supplement (PMC6125557)
Supplement: zac009187410s1.pdf [file zac009187410s1.pdf]

**Table S1.** *In vitro* susceptibility, MIC<sub>50</sub> and MIC<sub>90</sub> by BCC species.

|                                            | Trimethoprim-sulfamethoxazole |                          |                          | Ceftazidime-avibactam |                          |                          | Ceftazidime        |                          |                          | Ceftolozane-tazobactam |                          |                          | Temocillin         |                          |                          |
|--------------------------------------------|-------------------------------|--------------------------|--------------------------|-----------------------|--------------------------|--------------------------|--------------------|--------------------------|--------------------------|------------------------|--------------------------|--------------------------|--------------------|--------------------------|--------------------------|
|                                            | Susceptibility (%)            | MIC <sub>50</sub> (mg/L) | MIC <sub>90</sub> (mg/L) | Susceptibility (%)    | MIC <sub>50</sub> (mg/L) | MIC <sub>90</sub> (mg/L) | Susceptibility (%) | MIC <sub>50</sub> (mg/L) | MIC <sub>90</sub> (mg/L) | Susceptibility (%)     | MIC <sub>50</sub> (mg/L) | MIC <sub>90</sub> (mg/L) | Susceptibility (%) | MIC <sub>50</sub> (mg/L) | MIC <sub>90</sub> (mg/L) |
| <i>Burkholderia cepacia</i> complex (n=91) | 82                            | ≤0.5                     | 8                        | 81                    | 4                        | 16                       | 63                 | 4                        | ≥32                      | 63                     | 2                        | ≥32                      | 67                 | 16                       | 64                       |
| <i>B. multivorans</i> (n=50)               | 96                            | ≤0.5                     | 4                        | 84                    | 4                        | 16                       | 72                 | 4                        | 32                       | 68                     | 2                        | ≥32                      | 64                 | 16                       | 64                       |
| <i>B. vietnamiensis</i> (n=16)             | 50                            | 4                        | 16                       | 75                    | 4                        | 16                       | 50                 | 2                        | ≥32                      | 63                     | 4                        | ≥32                      | 63                 | 16                       | 32                       |
|                                            | Susceptibility (%)            | MIC range (mg/L)         |                          | Susceptibility (%)    | MIC range (mg/L)         |                          | Susceptibility (%) | MIC range (mg/L)         |                          | Susceptibility (%)     | MIC range (mg/L)         |                          | Susceptibility (%) | MIC range (mg/L)         |                          |
| <i>B. cenocepacia</i> (n=8)                | 75                            | ≤0.5                     | 8                        | 88                    | 2                        | 16                       | 63                 | 2                        | 32                       | 75                     | 1                        | 32                       | 88                 | 2                        | 64                       |
| <i>B. stabilis</i> (n=8)                   | 75                            | 4                        | 16                       | 63                    | 4                        | ≥16                      | 13                 | 4                        | ≥32                      | 0                      | 8                        | ≥32                      | 50                 | 8                        | ≥64                      |
| Other BCC species <sup>a</sup> (n= 9)      | 67                            | ≤0.5                     | 32                       | 89                    | 2                        | 16                       | 78                 | 2                        | 16                       | 78                     | 1                        | 32                       | 67                 | 4                        | 32                       |

  

|                                            | Piperacillin-tazobactam |                          |                          | Piperacillin       |                          |                          | Meropenem          |                          |                          | Aztreonam          |                          |                          | Cefepime           |                          |                          |
|--------------------------------------------|-------------------------|--------------------------|--------------------------|--------------------|--------------------------|--------------------------|--------------------|--------------------------|--------------------------|--------------------|--------------------------|--------------------------|--------------------|--------------------------|--------------------------|
|                                            | Susceptibility (%)      | MIC <sub>50</sub> (mg/L) | MIC <sub>90</sub> (mg/L) | Susceptibility (%) | MIC <sub>50</sub> (mg/L) | MIC <sub>90</sub> (mg/L) | Susceptibility (%) | MIC <sub>50</sub> (mg/L) | MIC <sub>90</sub> (mg/L) | Susceptibility (%) | MIC <sub>50</sub> (mg/L) | MIC <sub>90</sub> (mg/L) | Susceptibility (%) | MIC <sub>50</sub> (mg/L) | MIC <sub>90</sub> (mg/L) |
| <i>Burkholderia cepacia</i> complex (n=91) | 58                      | 4                        | ≥64                      | 47                 | 8                        | ≥64                      | 51                 | 2                        | 8                        | 45                 | 8                        | ≥32                      | 37                 | 8                        | ≥32                      |
| <i>B. multivorans</i> (n=50)               | 68                      | 2                        | ≥64                      | 66                 | 4                        | ≥64                      | 58                 | 2                        | 8                        | 62                 | 4                        | ≥32                      | 30                 | 4                        | ≥32                      |
| <i>B. vietnamiensis</i> (n=16)             | 50                      | 4                        | ≥64                      | 50                 | 4                        | 64                       | 50                 | 2                        | 8                        | 50                 | 4                        | ≥32                      | 13                 | 16                       | ≥32                      |
|                                            | Susceptibility (%)      | MIC range (mg/L)         |                          | Susceptibility (%) | MIC range (mg/L)         |                          | Susceptibility (%) | MIC range (mg/L)         |                          | Susceptibility (%) | MIC range (mg/L)         |                          | Susceptibility (%) | MIC range (mg/L)         |                          |
| <i>B. cenocepacia</i> (n=8)                | 63                      | 2                        | ≥64                      | 0                  | 8                        | ≥64                      | 50                 | 2                        | 16                       | 0                  | 8                        | ≥32                      | 0                  | 8                        | ≥32                      |
| <i>B. stabilis</i> (n=8)                   | 0                       | 8                        | ≥64                      | 0                  | 16                       | ≥64                      | 0                  | 4                        | ≥32                      | 0                  | 16                       | ≥32                      | 13                 | 4                        | ≥32                      |
| Other BCC species <sup>a</sup> (n= 9)      | 44                      | 4                        | ≥64                      | 22                 | 4                        | ≥64                      | 56                 | 2                        | 16                       | 22                 | 4                        | ≥32                      | 56                 | 2                        | ≥32                      |

<sup>a</sup> *B. contaminans* (n=4), *B. lata* (n=3) and *B. cepacia* (n=2)
